# Supplementary material
Source: publisher figshare collection journal article supplement (https://tandf.figshare.com/ndownloader/files/31958259)
Supplement: Supplementary file 1 [file 31958259]

Supplementary table 1. Details of plot description, environmental variables (physical, chemical and biological), litter bag description (weight of each species) and output from fitting exponential model to mass loss (*a; asymptote, k; mass loss rate, turnover time= 1/k)*. All the R2 of the model fit range from 0.90 to 1 and are therefore not detailed here (n = 4 for each model). Missing values are from plots that did not have a water table for sampling or if a litter bag was missing. Thaw status represents the number of weeks between June and August without a frost table. Thaw designation is P (permafrost) or T (thawed) where P are the plots that are ecohydrologically characterized as a palsa (used only for the analysis in Figure 4).
